# Supplementary material for: Latrophilin receptors: novel bronchodilator targets in asthma
Source: PubMed Central journal article supplement (PMC5329048; doi:10.1136/thoraxjnl-2015-207236), 2016-06-20
Supplement: thoraxjnl-2015-207236supp.pdf [file thoraxjnl-2015-207236supp.pdf]

## Supplementary Materials

### Airway smooth muscle culture

Following isolation and initial growth, ASMC at passages 3-4 were seeded at  $1 \times 10^6$  cell/cm<sup>2</sup> and grown in growth media (Dulbecco's modification of Eagle's medium (DMEM) (Invitrogen), 5% foetal bovine serum (FBS) and 1% antibiotics (Invitrogen)) for 3-4 days. Cells were then quiesced in DMEM supplemented with 0.1% bovine serum albumin (BSA) (Sigma Aldrich, St Louis, MO, USA), and 1% antibiotics (Invitrogen)) for 72 hours.

### Candidate gene analysis of LPHN1&3

This study was approved by the medical ethical committee and consistent with the Research Code of the University Medical Center Groningen and Dutch national ethical and professional guidelines ("Code of conduct; Dutch federation of biomedical scientific societies"; <http://www.federa.org>). Candidate gene analysis was conducted on SNPs within 200kb flanking the *LPHN1* and *3* genes using the Dutch Asthma GWAS (DAG) cohort. The DAG cohort consists of 920 asthma cases and 980 controls, all from the northern part of the Netherlands. This cohort was genotyped in two phases and meta-analysed afterwards. For the first phase, 468 cases were selected from a trio and family study. The 469 controls were non-asthmatic spouses or pseudo-controls of untransmitted alleles in our trio design (GWAS I). For the second phase (GWAS II), 452 asthmatics were selected from previous clinical and genetic studies performed by our research institute. The 511 controls were selected from the COPACETIC study, a geographically matched population-based study on lung cancer screening in male smokers<sup>1</sup>.

All asthmatics had asthma symptoms, a physician's diagnosis of asthma, and BHR to either histamine or methacholine. Controls had no asthma or COPD, nor any evidence of significant airway obstruction. BHR was measured with a methacholine or histamine challenge test, and defined as PC<sub>20</sub> histamine.

The severity of BHR was calculated based on the slope of the challenge test with either methacholine or histamine. The slope was calculated by dividing the difference between FEV<sub>1</sub> at baseline and at the dose step at which a 20% fall or more in FEV<sub>1</sub> was reached, by the dose that was inhaled at this last step. We divided the BHR slopes of the 30-second tidal breathing method by 4 in order to compare the slope of the 30-second tidal breathing method with the 2-minute method. Values were log transformed to reach normal distribution.

650 Asthmatics with measurements on ICS use and smoking history were included in the analysis. Linear regression analyses were performed in an additive model to analyze the effect of SNPs on slopes of the BHR test with adjustments for smoking and inhaled and/or oral corticosteroid use. Smoking was labelled as never, current or ex-smokers. ICS use was labelled as the time stopped before the challenge test: 1) never on steroids or stopped longer than 4 weeks, 2) stopped between 2-4 weeks or 3) stopped between 0-2 weeks before the challenge test.

## **Expression QTL analysis**

### *Ethics approval*

At Laval, lung specimens were collected from patients undergoing lung cancer surgery and stored at the “Institut universitaire de cardiologie et de pneumologie de Québec” (IUCPQ) site of the Respiratory Health Network Tissue Bank of the “Fonds de recherche du Québec – Santé” ([www.tissuebank.ca](http://www.tissuebank.ca)). Written informed consent was obtained from all subjects and the study was approved by the IUCPQ ethics committee. At Groningen, lung specimens were provided by the local tissue bank of the Department of Pathology and the study protocol was consistent with the Research Code of the University Medical Center Groningen and Dutch national ethical and professional guidelines (“Code of conduct; Dutch federation of biomedical scientific societies”; <http://www.federa.org>). At Vancouver, the lung specimens were provided by the James Hogg Research Center Biobank at St Paul's Hospital and subjects provided written informed consent. The study was approved by the ethics committees at the UBC-Providence Health Care Research Institute Ethics Board.

### *eQTL analysis*

Probes located in the genes of interest were selected for *cis*-eQTL analysis (genome build reference 36.3). eQTL analyses were performed per site and then meta-analyzed. To correct for technical variance, principal components were calculated on the residuals of a linear regression on the gene-expression data with correction for gender, age and smoking. Principal components which explained more than 5% of the variance were added as covariates in the eQTL analysis on the gene-expression data. eQTL analysis was performed using a linear regression with correction for gender, age, smoking and technical variance (principal components). Selected probes were checked for any known polymorphisms in the probe (primer polymorphisms).

## **Quantitative real-time PCR (qPCR)**

To validate microarray results, qPCR was conducted on total mRNA isolated from asthmatic (n=15) and healthy (n=6) ASMC cultured using the same method as microarray samples. qPCR was conducted using Taqman primers (LPHN1(Hs00208706\_m1), 2 (Hs00202347\_m1) and 3(Hs00248624\_m1)), and was normalised to 18S (4319413E )(Life Technologies). Mann whitney U t-test were used to compare LPHN gene expression levels between asthmatic and healthy ASMC.

## **ASMC hTERT Immortalisation**

Immortalised ASMCs (IASMC) were used to confirm findings from primary ASMC and identify the functional role of LPHN family of receptors in asthmatic and healthy IASMC lines. The immortalisation of primary ASMC was carried out as described previously <sup>2</sup>.

## **Immunohistochemistry**

To measure expression of LPHN3, *ex vivo* immunohistochemistry was conducted on airway bronchial sections using rabbit anti-human LPHN3 antibody [500 ng/ml], which was performed in parallel with rabbit IgG (DakoCytomation) as an isotype control at the same concentration as the primary antibody, according to Faiz *et al.* (2013). Quantification of immunostaining of the images taken was completed using Image J (v1.42q, NIH) to define the area of staining (the number of brown pixels in the image). Area of interest analysis was used for the evaluation of ASM specific immunostaining of LPHN3 which was determined for 5 representative images of each section (patient) and averaged. Mann whitney U t-test were used to compare LPHN3 protein levels between asthmatic and healthy sections.

## **Attachment assay**

To investigate the function of the LPHN3 in cellular attachment to FLRT3 attachment assays were conducted. Briefly, 96 well plates were coated with FLRT3 (5 and 10 ng/ml) or fibronectin (5 ng/ml) in PBS for 2 hours at 37°C. The plate was then blocked with 1% BSA in PBS for 1 hour at 37°C. 16,000 ASM cells per well were seeded in *quiescing* media and left for 2 hours at 37°C in 5% CO<sub>2</sub>. Unattached cells were removed by washing 3 times with PBS. Cells were then fixed with 1% (v/v) paraformaldehyde for 5 minutes and stained with ice cold (0.5%) toluidine blue (Sigma-Aldrich St. Louis, MO, USA) containing 0.5% (v/v) boric acid (Sigma-Aldrich) for an additional 5 minutes. Stained cells were washed with distilled water and solubilized using 1% (w/v) Sodium dodecyl sulphate (SDS) in PBS. Cell attachment was measured by spectrophotometry at absorbance 595 nm using the Spectramax M2 (Molecular Devices, Sunnyvale, CA, USA) and collected using Spectramax software (Molecular Devices). Friedman test with Dunn's correction was used.

## **Proliferation assay**

To investigate the function of FLRT3 in ASMC proliferation a proliferation assay was conducted. Briefly, ASMC were seeded at  $5 \times 10^3$  cells/cm<sup>2</sup> overnight in growth media (DMEM, 10% FBS 1% antibiotics) ASMC before being *quiesced* for 72 hours. Cells were then treated with either *quiescing* media (control), FLRT3 (10 ng/ml) or  $\alpha$ -LTX (1 nM), FLRT3 (10 ng/ml) or  $\alpha$ -LTX (1 nM) + PD98059 (10  $\mu$ M) or FLRT3 (10 ng/ml) or  $\alpha$ -LTX (1

nM) +LY294002 (3  $\mu$ M) for 72 hours. Proliferation was measured by manual cell counts as previously described<sup>3</sup>. Friedman test with Dunn's correction was used.

## Myographs

Trachea and bronchi were isolated from male Balb/C mice were prepared as previously described<sup>4</sup>.

Briefly, male Balb/C mice were killed by intraperitoneal injection of 0.4 mL sodium pentobarbitone (60 mg/mL) at 6-8 weeks of age. Bronchial smooth muscle reactivity was analysed in temperature-controlled (37°C) myographs (Organ Bath Model 700MO, J.P. Trading, Aarhus, Denmark) containing KREBS solution continuously equilibrated with 5% CO<sub>2</sub> and 95% O<sub>2</sub>. Fine wire (50  $\mu$ m) was threaded through the tissue lumen and connected to a force displacement transducer and micrometer to record changes in isometric tension ( $\Delta$ mN) via Power Lab and Chart software (AD Instruments Ltd, Hastings, U.K.). After an equilibration period of 30 min, tissues were exposed to KPSS at differing tensions (1.2, 1.5, 1.8mN for trachea; 1.0, 2.0, 3.0 mN for bronchi) in order to determine an optimal resting tension for each tissue, corresponding to the highest KPSS response. Tissues were then contracted with ACh 10<sup>-4</sup> M and treated with either  $\alpha$ -LTX or FLRT3. For  $\alpha$ -LTX treatments tissues were pre-treated with or without atropine (3  $\mu$ M) for 20 min and then treated with  $\alpha$ -LTX (10 nM). FLRT3 was added cumulatively (10-3000 pM) in the presence and absence of the epithelial layer or in the presence of EP2/4 antagonists (AH6809 (3  $\mu$ M) and L161982 (1  $\mu$ M)). The FLRT3 was then washed out and bronchi pre-contracted to ACh and then treated with substance P (SP) to confirm the presence (relaxation) or absence (no relaxation) of the epithelial layer. All data is expressed as mean  $\pm$  SEM.  $\alpha$ -LTX data is presented as a % of the ACh maximum response and FLRT3 data is presented as %KPSS response.

**Table S1. Demographics of the individual patients from whom samples were obtained**

| No. | Diagnosis          | Age | Gender | Samples | FEV1% predicted | Experiments where used |
|-----|--------------------|-----|--------|---------|-----------------|------------------------|
| 1   | Non diseased donor | 31  | F      | IASMC   | 105             | 6,7,8                  |
| 2   | Non diseased donor | 23  | M      | IASMC   | 82              | 7,8                    |
| 3   | Non diseased donor | 22  | F      | IASMC   | 87              | 6,7,8                  |
| 4   | Asthma             | 39  | M      | IASMC   | 84              | 6,7,8                  |
| 5   | Asthma             | 29  | M      | IASMC   | 89              | 6,7,8                  |
| 6   | Asthma             | 21  | M      | IASMC   | 108             | 6,7                    |

|     |                             |    |    |              |    |       |
|-----|-----------------------------|----|----|--------------|----|-------|
| 7   | Asthma                      | 31 | M  | IASMC        | 85 | 6,7   |
| 8   | Asthma                      | 27 | F  | IASMC        | 78 | 7,8   |
| 9   | Asthma                      | 33 | M  | IASMC        | 78 | 6,7,8 |
| 10  | Non diseased donor          | 69 | M  | IASMC        | N  | 7,8   |
| 11  | Non diseased donor          | 48 | M  | IASMC        | N  | 7     |
| 12  | Non diseased donor          | 22 | F  | IASMC        | N  | 7     |
| 13  | Asthma                      | 38 | M  | Bronchoscopy | 72 | 2     |
| 14  | NSCCa                       | 68 | M  | Resection    | 82 | 2     |
| 15  | NSCCa                       | 71 | M  | Resection    | 79 | 2     |
| 16  | Asthma                      | 33 | F  | Transplant   | N  | 1     |
| 17  | Asthma                      | 33 | M  | Bronchoscopy | N  | 3     |
| 18  | Asthma                      | 19 | F  | Bronchoscopy | N  | 3     |
| 19  | Asthma                      | 19 | M  | Bronchoscopy | N  | 1,3   |
| 20  | Asthma                      | 19 | M  | Bronchoscopy | N  | 3     |
| 21  | Asthma                      | 30 | M  | Bronchoscopy | N  | 3     |
| 22  | Asthma                      | 71 | M  | Resection    | N  | 3     |
| z23 | Asthma                      | 22 | M  | Bronchoscopy | N  | 1,3   |
| 24  | Asthma                      | 69 | M  | Bronchoscopy | N  | 3     |
| 25  | Asthma                      | 59 | F  | Bronchoscopy | N  | 3     |
| 26  | Asthma                      | 56 | F  | Bronchoscopy | 85 | 3     |
| 27  | Asthma                      | 42 | M  | Resection    | N  | 3     |
| 28  | Asthma                      | 21 | M  | Bronchoscopy | 67 | 2,3   |
| 29  | Asthma                      | 39 | M  | Bronchoscopy | N  | 3     |
| 30  | Asthma                      | 27 | F  | Bronchoscopy | 79 | 3     |
| 31  | Asthma                      | 23 | M  | Bronchoscopy | 82 | 3     |
| 32  | Asthma                      | 51 | F  | Transplant   | 36 | 3     |
| 33  | Non diseased donor          | 20 | M  | Bronchoscopy | N  | 3     |
| 34  | Non diseased donor          | 27 | F  | Bronchoscopy | N  | 3     |
| 35  | Non diseased donor          | 21 | F  | Bronchoscopy | N  | 1,3   |
| 36  | Non diseased donor          | 30 | M  | Bronchoscopy | N  | 3     |
| 37  | Non diseased donor          | 31 | M  | Bronchoscopy | N  | 1,3   |
| 38  | Non diseased donor          | 22 | M  | Bronchoscopy | N  | 1,3   |
| 39  | Asthma/ Alpha 1 antitrypsin | 39 | M  | Transplant   | 8  | 5     |
| 40  | Ca                          | 58 | F  | Resection    | N  | 5     |
| 41  | Asthma Death                | 15 | M  | Transplant   | N  | 5     |
| 42  | Asthma                      | 80 | M  | Bronchoscopy | N  | 5     |
| 43  | Non diseased donor          | NA | NA | Transplant   | N  | 5     |
| 44  | Non diseased MVA            | 42 | M  | Transplant   | N  | 5     |
| 45  | Non diseased MVA            | NA | NA | Transplant   | N  | 5     |
| 46  | Non diseased MVA            | 16 | M  | Transplant   | N  | 5     |

|    |                         |    |   |            |   |   |
|----|-------------------------|----|---|------------|---|---|
|    | Non diseased            |    |   | Transplant | N |   |
| 47 | Hemorrhage              | 52 | M |            |   | 5 |
| 48 | Non diseased MVA        | 25 | M | Transplant | N | 5 |
| 49 | Non diseased Hemorrhage | 50 | M | Transplant | N | 5 |
| 50 | Asthma                  | 17 | M | Transplant | N | 5 |
| 51 | Non diseased Trauma     | 40 | M | Transplant | N | 5 |
| 52 | Ca                      | 70 | M | Resection  | N | 5 |
| 53 | Non diseased donor      | 30 | M | Transplant | N | 5 |
| 54 | Non diseased donor      | 53 | M | Transplant | N | 5 |
| 55 | Asthma Death            | 15 | M | Transplant | N | 5 |
| 56 | Asthma Death            | 80 | M | Transplant | N | 5 |
| 57 | Asthma Death            | 15 | M | Transplant | N | 5 |
| 58 | Non diseased donor      | 30 | M | Transplant | N | 5 |

Abbreviations: M = male, F = female, Ca= carcinoma, NSCCa= non-small cell carcinoma, MVA= motor vehicle accident= HuGene1\_0-st-v1 microarray, 2= long range PCR and sequencing, 3= qPCR (LPHN1,2 and 3), 4= LPHN3 Western Immunoblot, 5= LPHN3 Immunohistochemistry, 6= Attachment, 7= Proliferation and 8=ERK1/2 and AKT phosphorylation

**Table S2. Top 10 genes up-regulated in asthmatic ASMC compared to healthy ASMC**

| Gene Symbol  | Gene Name                                                              | Log2 Fold change | p value   | FDR   |
|--------------|------------------------------------------------------------------------|------------------|-----------|-------|
| PDE1C        | phosphodiesterase 1C, calmodulin-dependent 70kDa                       | 2.138            | 1.676E-04 | 0.257 |
| TPM1         | tropomyosin 1 (alpha)                                                  | 1.234            | 2.056E-04 | 0.260 |
| KIAA1324L    | KIAA1324-like                                                          | 2.135            | 3.126E-04 | 0.325 |
| PRUNE2       | prune homolog 2 (Drosophila)                                           | 2.559            | 5.883E-04 | 0.384 |
| CYR61        | cysteine-rich, angiogenic inducer, 61                                  | 1.508            | 6.068E-04 | 0.384 |
| ID4          | inhibitor of DNA binding 4, dominant negative helix-loop-helix protein | 1.546            | 6.638E-04 | 0.384 |
| CSRP1        | cysteine and glycine-rich protein 1                                    | 1.320            | 7.117E-04 | 0.384 |
| FAT3         | FAT atypical cadherin 3                                                | 1.068            | 7.399E-04 | 0.384 |
| <b>LPHN3</b> | <b>latrophilin 3</b>                                                   | <b>2.110</b>     | 8.485E-04 | 0.395 |
| PRUNE2       | prune homolog 2 (Drosophila)                                           | 2.774            | 1.002E-03 | 0.405 |

**Table S3. Top 10 genes down-regulated in asthmatic ASMC compared to healthy ASMC**

| Gene Symbol | Gene Name                                                                                      | Log2 Fold change | p value   | FDR   |
|-------------|------------------------------------------------------------------------------------------------|------------------|-----------|-------|
| PLEKHG1     | pleckstrin homology domain containing, family G (with RhoGef domain) member 1                  | -2.260           | 9.630E-07 | 0.019 |
| PSG4        | pregnancy specific beta-1-glycoprotein 4                                                       | -3.524           | 1.320E-06 | 0.019 |
| TCN2        | transcobalamin II                                                                              | -1.582           | 2.990E-06 | 0.029 |
| PTDSS1      | phosphatidylserine synthase 1                                                                  | -1.043           | 5.020E-06 | 0.037 |
| EYA1        | eyes absent homolog 1 (Drosophila)                                                             | -2.009           | 1.270E-05 | 0.066 |
| MLPH        | melanophilin                                                                                   | -1.984           | 2.930E-05 | 0.122 |
| GALNT5      | UDP-N-acetyl-alpha-D-galactosamine:polypeptide N-acetylgalactosaminyltransferase 5 (GalNAc-T5) | -1.425           | 4.410E-05 | 0.143 |
| IGDCC4      | immunoglobulin superfamily, DCC subclass, member 4                                             | -1.920           | 5.470E-05 | 0.159 |
| PARD6G      | par-6 family cell polarity regulator gamma                                                     | -1.276           | 6.960E-05 | 0.184 |
| PTPRU       | protein tyrosine phosphatase, receptor type, U                                                 | -1.245           | 8.660E-05 | 0.210 |

**Table S4. Gene Set Enrichment Analysis (GSEA)**

| NAME                                                                                    | FDR q-val |
|-----------------------------------------------------------------------------------------|-----------|
| <b>Enriched for genes up-regulated in asthmatic ASMC relative to healthy controls</b>   |           |
| REGULATION OF MUSCLE CONTRACTION                                                        | 3.93E-02  |
| POSITIVE REGULATION OF BINDING                                                          | 4.10E-02  |
| REGULATION OF HEART CONTRACTION                                                         | 4.55E-02  |
| <b>Enriched for genes down-regulated in asthmatic ASMC relative to healthy controls</b> |           |
| GLYCOLIPID METABOLIC PROCESS                                                            | 5.80E-03  |
| JAK STAT CASCADE                                                                        | 8.49E-03  |
| LIPID BIOSYNTHETIC PROCESS                                                              | 1.27E-02  |
| LIPID METABOLIC PROCESS                                                                 | 2.31E-02  |

**Table S5. SNPs for *LPHN1* and *LPHN3* associations with severity of BHR within asthma**

| CHR          | SNP        | BP       | TA | BETA   | L95    | U95   | P value | FDR |
|--------------|------------|----------|----|--------|--------|-------|---------|-----|
| <b>LPHN1</b> |            |          |    |        |        |       |         |     |
| 19           | rs3810256  | 14120846 | A  | -0.011 | -0.290 | 0.268 | 0.941   | 1   |
| 19           | rs2420416  | 14159442 | G  | -0.095 | -0.292 | 0.101 | 0.342   | 1   |
| <b>LPHN3</b> |            |          |    |        |        |       |         |     |
| 4            | rs12509742 | 62327627 | A  | 0.023  | -0.145 | 0.192 | 0.787   | 1   |
| 4            | rs2345043  | 62330503 | T  | 0.023  | -0.145 | 0.192 | 0.787   | 1   |
| 4            | rs1450903  | 62352873 | G  | -0.005 | -0.278 | 0.269 | 0.973   | 1   |
| 4            | rs10517547 | 62354238 | A  | 0.121  | -0.113 | 0.355 | 0.310   | 1   |
| 4            | rs11734607 | 62376287 | T  | -0.003 | -0.183 | 0.178 | 0.977   | 1   |
| 4            | rs2345041  | 62380952 | A  | -0.095 | -0.316 | 0.126 | 0.398   | 1   |
| 4            | rs2015569  | 62401922 | T  | 0.033  | -0.246 | 0.311 | 0.818   | 1   |
| 4            | rs7667328  | 62409295 | G  | 0.103  | -0.192 | 0.398 | 0.496   | 1   |
| 4            | rs10446786 | 62409469 | G  | -0.076 | -0.261 | 0.109 | 0.421   | 1   |
| 4            | rs13110933 | 62416032 | C  | -0.047 | -0.223 | 0.129 | 0.599   | 1   |
| 4            | rs6551665  | 62422136 | G  | -0.116 | -0.291 | 0.058 | 0.191   | 1   |
| 4            | rs6846033  | 62422269 | C  | 0.093  | -0.121 | 0.306 | 0.394   | 1   |
| 4            | rs9683662  | 62430979 | T  | 0.000  | -0.190 | 0.191 | 0.996   | 1   |
| 4            | rs6858066  | 62436915 | A  | -0.052 | -0.226 | 0.123 | 0.561   | 1   |
| 4            | rs11131347 | 62441865 | T  | -0.030 | -0.200 | 0.141 | 0.734   | 1   |
| 4            | rs1470724  | 62444465 | C  | 0.062  | -0.130 | 0.254 | 0.526   | 1   |
| 4            | rs6551666  | 62446070 | C  | -0.056 | -0.256 | 0.143 | 0.580   | 1   |
| 4            | rs10517549 | 62471863 | G  | 0.008  | -0.182 | 0.198 | 0.932   | 1   |
| 4            | rs734644   | 62483323 | T  | -0.009 | -0.209 | 0.192 | 0.933   | 1   |



|   |            |          |   |        |        |       |       |   |
|---|------------|----------|---|--------|--------|-------|-------|---|
| 4 | rs1450896  | 62499334 | A | 0.123  | -0.413 | 0.659 | 0.653 | 1 |
| 4 | rs995447   | 62501063 | C | -0.130 | -0.452 | 0.191 | 0.427 | 1 |
| 4 | rs1510925  | 62513128 | G | -0.033 | -0.250 | 0.184 | 0.765 | 1 |
| 4 | rs1397545  | 62517697 | A | -0.021 | -0.299 | 0.256 | 0.880 | 1 |
| 4 | rs1397543  | 62521660 | T | -0.037 | -0.256 | 0.182 | 0.742 | 1 |
| 4 | rs1397548  | 62528085 | A | -0.068 | -0.260 | 0.123 | 0.485 | 1 |
| 4 | rs17292128 | 62533752 | C | 0.066  | -0.159 | 0.291 | 0.566 | 1 |
| 4 | rs10017760 | 62539254 | A | -0.159 | -0.384 | 0.066 | 0.166 | 1 |
| 4 | rs2271339  | 62544980 | G | 0.174  | -0.022 | 0.370 | 0.082 | 1 |
| 4 | rs13115125 | 62550048 | G | -0.026 | -0.197 | 0.145 | 0.764 | 1 |
| 4 | rs1510920  | 62566026 | C | 0.127  | -0.289 | 0.542 | 0.549 | 1 |
| 4 | rs6827266  | 62584757 | T | -0.010 | -0.177 | 0.158 | 0.909 | 1 |
| 4 | rs1397546  | 62597619 | C | 0.007  | -0.164 | 0.178 | 0.936 | 1 |
| 4 | rs11736888 | 62606392 | T | 0.053  | -0.154 | 0.259 | 0.617 | 1 |

Abbreviations used CHR=Chromosome, BP = base pair, TA=tested allele, U95=95% Upper limit, L95=95% Lower limit

## References

1. Dijkstra AE, Postma DS, van Ginneken B, et al. Novel genes for airway wall thickness identified with combined genome-wide association and expression analyses. *American journal of respiratory and critical care medicine* 2015;**191**(5):547-56.
2. Gosens R, Stelmack GL, Dueck G, et al. Role of caveolin-1 in p42/p44 MAP kinase activation and proliferation of human airway smooth muscle. *American Journal of Physiology-Lung Cellular and Molecular Physiology* 2006;**291**(3):L523-L534.
3. Johnson PR, Burgess JK, Underwood PA, et al. Extracellular matrix proteins modulate asthmatic airway smooth muscle cell proliferation via an autocrine mechanism. *Journal of Allergy and Clinical Immunology* 2004;**113**(4):690-96.
4. Donovan C, Royce SG, Esposito J, et al. Differential effects of allergen challenge on large and small airway reactivity in mice. *PloS one* 2013;**8**(9):e74101.
